# Supplementary material for: Dysregulation of PGC-1α-Dependent Transcriptional Programs in Neurological and Developmental Disorders: Therapeutic Challenges and Opportunities
Source: MDPI journal article supplement (doi:10.3390/cells10020352), 2021-02-09
Supplement: s1 [file s1]

Huntington Disease

| Species |                                                                      | Tissue | PGC-1α Expression                        | Protein/Transcript |                                              | Downstream Genes                         | Expression        | Citation | PMID     |
|---------|----------------------------------------------------------------------|--------|------------------------------------------|--------------------|----------------------------------------------|------------------------------------------|-------------------|----------|----------|
| Human   | Presymptomatic, postmortem caudate                                   |        | Decreased                                | Transcript         | Not measured                                 |                                          | N/A               | [112]    | 17018277 |
| Human   | Presymptomatic, postmortem cerebellum, hippocampus                   |        | No Change                                | Transcript         | Not measured                                 |                                          | N/A               | [112]    | 17018277 |
| Human   | Presymptomatic, postmortem caudate (PMID16467349)                    |        | Decreased                                | Transcript         |                                              | ACADM, COX7C, CYCS, LDHB, NDUFS3, NDUFB5 | Decreased         | [113]    | 17055784 |
| Human   | Brain lysates                                                        |        | Decreased; clinical grade dependent      | Protein            | TFAM                                         |                                          | Decreased         | [94]     | 20660112 |
| Human   | Symptomatic, putamen                                                 |        | FL-PGC-1α inconsistent                   | Protein            | Not measured                                 |                                          | N/A               | [118]    | 21757867 |
|         |                                                                      |        | NT-PGC-1α decr. grade 2, incr. grade 3&4 | Protein            | Not measured                                 |                                          | N/A               | [118]    | 21757867 |
| Human   | Myoblasts                                                            |        | FL-PGC-1α inconsistent                   | Protein            | Not measured                                 |                                          | N/A               | [118]    | 21757867 |
| Human   | Myoblasts                                                            |        | NT-PGC-1α decreased                      | Protein            | NRF1, TFAM                                   |                                          | Decreased         | [118]    | 21757867 |
| Human   | Symptomatic, muscle biopsy                                           |        | Decreased                                | Transcript         | NRF1, TFAM                                   |                                          | No change         | [115]    | 19460884 |
| Mouse   | STHdhQ111 (HD KI: PMID11092756)                                      |        | Decreased                                | Protein/Transcript | Coxiv, Cycs                                  |                                          | Decreased         | [112]    | 17018277 |
| Mouse   | STHdhQ111                                                            |        | NT-PGC-1α decreased                      | Protein            | Not measured                                 |                                          | N/A               | [118]    | 21757867 |
| Mouse   | STHdhQ111                                                            |        | Decreased                                | Transcript         | Cycs                                         |                                          | Decreased         | [115]    | 20665636 |
| Mouse   | STHdhQ111                                                            |        | Decreased                                | Transcript         | Not measured                                 |                                          | N/A               | [128]    | 30941017 |
| Mouse   | STHdhQ111                                                            |        | Decreased                                | Transcript         | Not measured                                 |                                          | N/A               | [114]    | 22589249 |
| Mouse   | STHdhQ111                                                            |        | FL-PGC-1α inconsistent                   | Protein            | Not measured                                 |                                          | N/A               | [118]    | 21757867 |
| Mouse   | R6/2; brain                                                          |        | FL-PGC-1α, NT-PGC-1α decreased           | Transcript         | Tfam                                         |                                          | Decreased         | [314]    | 22095692 |
| Mouse   | R6/2; muscle                                                         |        | FL-PGC-1α, NT-PGC-1α decreased           | Transcript         | Tfam                                         |                                          | Decreased         | [314]    | 22095692 |
| Mouse   | R6/2; brown adipose tissue                                           |        | FL-PGC-1α, NT-PGC-1α decreased           | Transcript         | Tfam                                         |                                          | Decreased         | [314]    | 22095692 |
| Mouse   | R6/2, N171-82Q striatum (younger)                                    |        | NT-PGC-1α decreased                      | Protein            | Not measured                                 |                                          | N/A               | [118]    | 21757867 |
| Mouse   | R6/2, N171-82Q striatum (symptomatic)                                |        | NT-PGC-1α increased                      | Protein            | Not measured                                 |                                          | N/A               | [118]    | 21757867 |
| Mouse   | R6/2, N171-82Q striatum                                              |        | FL-PGC-1α inconsistent                   | Protein            | Not measured                                 |                                          | N/A               | [118]    | 21757867 |
| Mouse   | R6/2; striatum                                                       |        | No Change                                | Transcript         | Pvalb                                        |                                          | Decreased; p>0.05 | [45]     | 22916173 |
| Mouse   | LCM-captured medium spiny neurons (HD KI: PMID12926013)              |        | Decreased                                | Transcript         | Not measured                                 |                                          | N/A               | [112]    | 17018277 |
| Mouse   | LCM-captured nNOS interneurons (HD KI: PMID12926013)                 |        | Increased                                | Transcript         | Not measured                                 |                                          | N/A               | [112]    | 17018277 |
| Mouse   | D9-N171-98Q striatum                                                 |        | Increased                                | Transcript         | Pvalb                                        |                                          | Increased         | [105]    | 21177255 |
| Mouse   | N171-82Q striatum                                                    |        | Decreased                                | Transcript         | Cox6a, Cycs, Ldhb, Ndufs3, Tfam              |                                          | Decreased         | [113]    | 17055784 |
| Mouse   | NLS-N171-82Q; soleus muscle                                          |        | Decreased                                | Protein/Transcript | Tfam                                         |                                          | Decreased         | [115]    | 19460884 |
| Mouse   | NLS-N171-82Q; extensor digitorum longus                              |        | Decreased                                | Protein/Transcript | Ppargc1b, Tfam                               |                                          | Decreased         | [115]    | 19460884 |
| Mouse   | NLS-N171-82Q;gastrocnemius                                           |        | No Change                                | Protein/Transcript | Tfam                                         |                                          | Decreased         | [115]    | 19460884 |
| Mouse   | NLS-N171-82Q; striatum                                               |        | Decreased                                | Protein/Transcript | Cox2, Creb, Esrra, Nr1f1, Nr1f2, Ppard, Tfam |                                          | Decreased         | [116]    | 20529956 |
| Mouse   | NLS-N171-82Q; cortex                                                 |        | No Change                                | Protein/Transcript | Coxiv, Esrra, Ppard                          |                                          | Decreased         | [116]    | 20529956 |
| Mouse   | NLS-N171-82Q; liver                                                  |        | Decreased                                | Transcript         | Hnf4a, Tfam                                  |                                          | Decreased         | [116]    | 20529956 |
| Mouse   | NLS-N171-82Q; brown adipose tissue                                   |        | Decreased;p >0.05                        | Transcript         | Ucp1                                         |                                          | Decreased; p>0.05 | [116]    | 20529956 |
| Mouse   | HD knock-in series ( PMID26908599); striatum                         |        | No Change                                | Transcript         | Ak1, Idh3a, Nceh1, Phyh, Wdr77               |                                          | Increased         | [61]     | 29491012 |
| Mouse   | HD knock-in series ( PMID26908599); cortex                           |        | No Change                                | Transcript         | Syt2, Nefh, Nceh1, etc.                      |                                          | No change         | [62]     | 32222555 |
| Mouse   | HD knock-in series ( PMID26908599); hippocampus                      |        | No Change                                | Transcript         | Syt2, Nefh, Nceh1, etc                       |                                          | No change         | [62]     | 32222555 |
| Mouse   | PVcre-mhtt                                                           |        | No Change                                | Transcript         | Pvalb                                        |                                          | No change         | [69]     | 24121117 |
| Rat     | Primary oligodendrocytes with lenti-mutant Htt exon1 (72Q)           |        | Decreased                                | Transcript         | Hmgcs1, Hmgcr, Mbp                           |                                          | Decreased         | [116]    | 21715619 |
| Rat     | Primary neurons; full-length Htt (wtHtt with 15Q or mtHtt with 138Q) |        | No Change                                | Transcript         | Not measured                                 |                                          | N/A               | [117]    | 19915593 |

Parkinson Disease

| Species |                    | Tissue | PGC-1α Expression | Protein/Transcript |              | Downstream Genes | Direction | Citation | PMID     |
|---------|--------------------|--------|-------------------|--------------------|--------------|------------------|-----------|----------|----------|
| Human   | iPSC human derived |        | Decreased         | Transcript         | Not measured |                  | N/A       | [187]    | 24290359 |

|            |                                                                              |           |                    |                                                                                           |                     |       |          |
|------------|------------------------------------------------------------------------------|-----------|--------------------|-------------------------------------------------------------------------------------------|---------------------|-------|----------|
| Human      | Substantia nigra from human post mortem PD patients Braak stage 5 or 6       | Decreased | Transcript         | Not measured                                                                              | N/A                 | [188] | 25363075 |
| Human      | Human H4 neuroglioma cells                                                   | Decreased | Transcript         | Not measured                                                                              | N/A                 | [188] | 25363075 |
| Human      | Human derived iPSC dopaminergic neurons, LRRK2 mutation carriers             | Decreased | Protein            | Not measured                                                                              | N/A                 | [197] | 29129681 |
| Human      | Human substantia nigra samples from PD patients                              | Decreased | Protein/Transcript | Soluble Parkin decreased, Insoluble Parkin increased,<br>NRF-1 decreased, PARIS increased | Decreased           | [177] | 21376232 |
| Human      | Human substantia nigra samples from PD patients                              | Decreased | Protein/Transcript | Insoluble Parkin, PARIS                                                                   | Increased           | [177] | 21376232 |
| Human      | PARKIN deficient human dopaminergic neurons                                  | Decreased | Protein/Transcript | PARIS/ZNF746                                                                              | Increased           | [181] | 32795422 |
| Human      | PARKIN deficient human dopaminergic neurons                                  | Decreased | Protein/Transcript | <i>PARK2</i>                                                                              | Decreased           | [181] | 32795422 |
| Human      | Laser captured dopaminergic neurons, PD patients with Lewy pathology         | No change | Protein/Transcript | Nuclear encoded mitochondrial genes                                                       | Increased/Decreased | [182] | 20926834 |
| Human      | Human substantia nigra samples from PD patients                              | Decreased | Protein/Transcript | Not measured                                                                              | N/A                 | [205] | 30236862 |
| Human      | Human substantia nigra samples from PD patients                              | Decreased | Protein            | <i>SDHA, TOMM20</i>                                                                       | Decreased           | [74]  | 27622213 |
| Human      | Neural progenitor Striatum cells                                             | Increased | Transcript         | <i>CAT1, CYCS, SOD1, SOD2, GPX1, UCP2</i>                                                 | Increased           | [52]  | 17055439 |
| Human      | SHSY5's MPTP treated with Necdin lentiviral expression                       | Increased | Protein            | Not measured                                                                              | N/A                 | [207] | 26971449 |
| Mouse      | A30P (Thy-1 alpha-syn mice) Brainstem and Cortex                             | Decreased | Transcript         | Not measured                                                                              | N/A                 | [188] | 25363075 |
| Mouse      | Conditional Paris knockout mice injected with LentiGFP-Cre                   | Decreased | Protein/Transcript | <i>Paris/Zfp746</i>                                                                       | Increased           | [177] | 21376232 |
| Mouse      | Conditional Paris knockout mice injected with LentiGFP-Cre                   | Decreased | Protein/Transcript | <i>Nrf1, Park2</i>                                                                        | Decreased           | [177] | 21376232 |
| Mouse      | Conditional Pgc-1alpha knockout injected with AAV-CRE-GFP                    | Decreased | Protein/Transcript | <i>Sdha, Tomm20</i>                                                                       | Decreased           | [74]  | 27622213 |
| Mouse      | PGC-1alpha null mice                                                         | Decreased | Transcript         | <i>Cytc, Ucp2, Ant1, Sod2, Gpx1, Cat1</i>                                                 | Decreased           | [52]  | 17055439 |
| Mouse      | PGC-1alpha null mice                                                         | Decreased | Transcript         | <i>Ucp3 , Sod1</i>                                                                        | No change           | [52]  | 17055439 |
| Mouse      | 10T1/2 cells treated with hydrogen peroxide                                  | Increased | Transcript         | <i>Cytc, Ucp2, Ucp3, Ant1, Sod1, Sod2, Gpx1, Cat1</i>                                     | No change           | [52]  | 17055439 |
| Mouse      | PGC-1alpha null mice injected with MPTP                                      | Decreased | Protein/Transcript | Not measured                                                                              | N/A                 | [52]  | 17055439 |
| Mouse      | MPTP treated non-transgenic mice                                             | Decreased | Protein/Transcript | <i>Esrra, Sirt3</i>                                                                       | Decreased           | [206] | 26421366 |
| Mouse      | MPTP treated non-transgenic mice                                             | Decreased | Protein/Transcript | <i>Atp5b, Sod2</i>                                                                        | Increased           | [206] | 26421366 |
| Mouse      | MPTP treated non-transgenic mice with Sirt3 deletion in dopaminergic neurons | Decreased | Protein            | <i>Esrra, Sirt3</i>                                                                       | Decreased           | [206] | 26421366 |
| Mouse      | MPTP treated non-transgenic mice with Sirt3 deletion in dopaminergic neurons | Decreased | Protein            | <i>Atp5b, Sod2</i>                                                                        | Increased           | [206] | 26421366 |
| Mouse      | MPTP injected striatum, cortex,and cerebellum 90 minutes after injection     | Increased | Transcript         | Not measured                                                                              | N/A                 | [209] | 28161458 |
| Mouse      | MPTP injected striatum, cortex,and cerebellum 7 days after injection         | No change | Transcript         | Not measured                                                                              | N/A                 | [209] | 28161458 |
| Mouse      | MPTP injected striatum, cortex,and cerebellum 12 days after injection        | No change | Transcript         | Not measured                                                                              | N/A                 | [209] | 28161458 |
| Mouse      | MPTP-induced models of 6h-PSS, 24h-PSS, AdvPSS andESS of PD                  | Decreased | Transcript         | <i>Kif1b, Mybb1a, Nrf1, Paris/Zfp746, Park2, Mybb1a</i>                                   | Decreased           | [210] | 32280590 |
| Drosophila | Drosophila S2 cell line or brain tissue with paris mutation                  | Decreased | Protein/Transcript | <i>Park2, Pink1</i>                                                                       | Decreased           | [179] | 32138754 |
| Rat        | 6-hydroxydopamine lesioned rats treated with ferulic acid                    | Increased | Protein/Transcript | <i>Drp1, Mfn2</i>                                                                         | Increased           | [219] | 31657074 |

Neurodevelopmental Disorders

| Species | Tissue                                                              | Direction | Protein/Transcript | Downstream Genes                     | Direction | Citation | PMID     |
|---------|---------------------------------------------------------------------|-----------|--------------------|--------------------------------------|-----------|----------|----------|
| Human   | Human genomic DNA from major depressive disorder and controls       | Increased | Transcript         | Not measured                         | N/A       | [236]    | 30381832 |
| Human   | Postmortem cingulate cortex tissue from patients with schizophrenia | No change | Transcript         | <i>Syt2, Cplx1, Nefh, Parv, Nrf1</i> | Decreased | [248]    | 26683626 |
| Mouse   | Ppp1r2-Cre/fGluN1 knockout mice                                     | Decreased | Protein            | <i>Cat1, Gpx1, Sod1, Sod2</i>        | Decreased | [53]     | 23348010 |

Supplemental Table S1. Summary of studies mentioned in the main text which reported the expression of PGC-1α transcript or protein in disease states.
